# Supplementary material for: Solwaric Acids A and B, Antibacterial Aromatic Acids from a Marine Solwaraspora sp
Source: PubMed Central journal article supplement (PMC3944528; doi:10.3390/md12021013), 2014-02-14

# Supplementary Information

Figure S1.  $^1\text{H}$  NMR (600 MHz,  $\text{CDCl}_3$ ) of **1**.

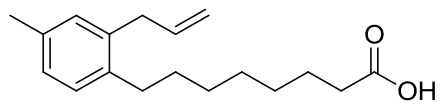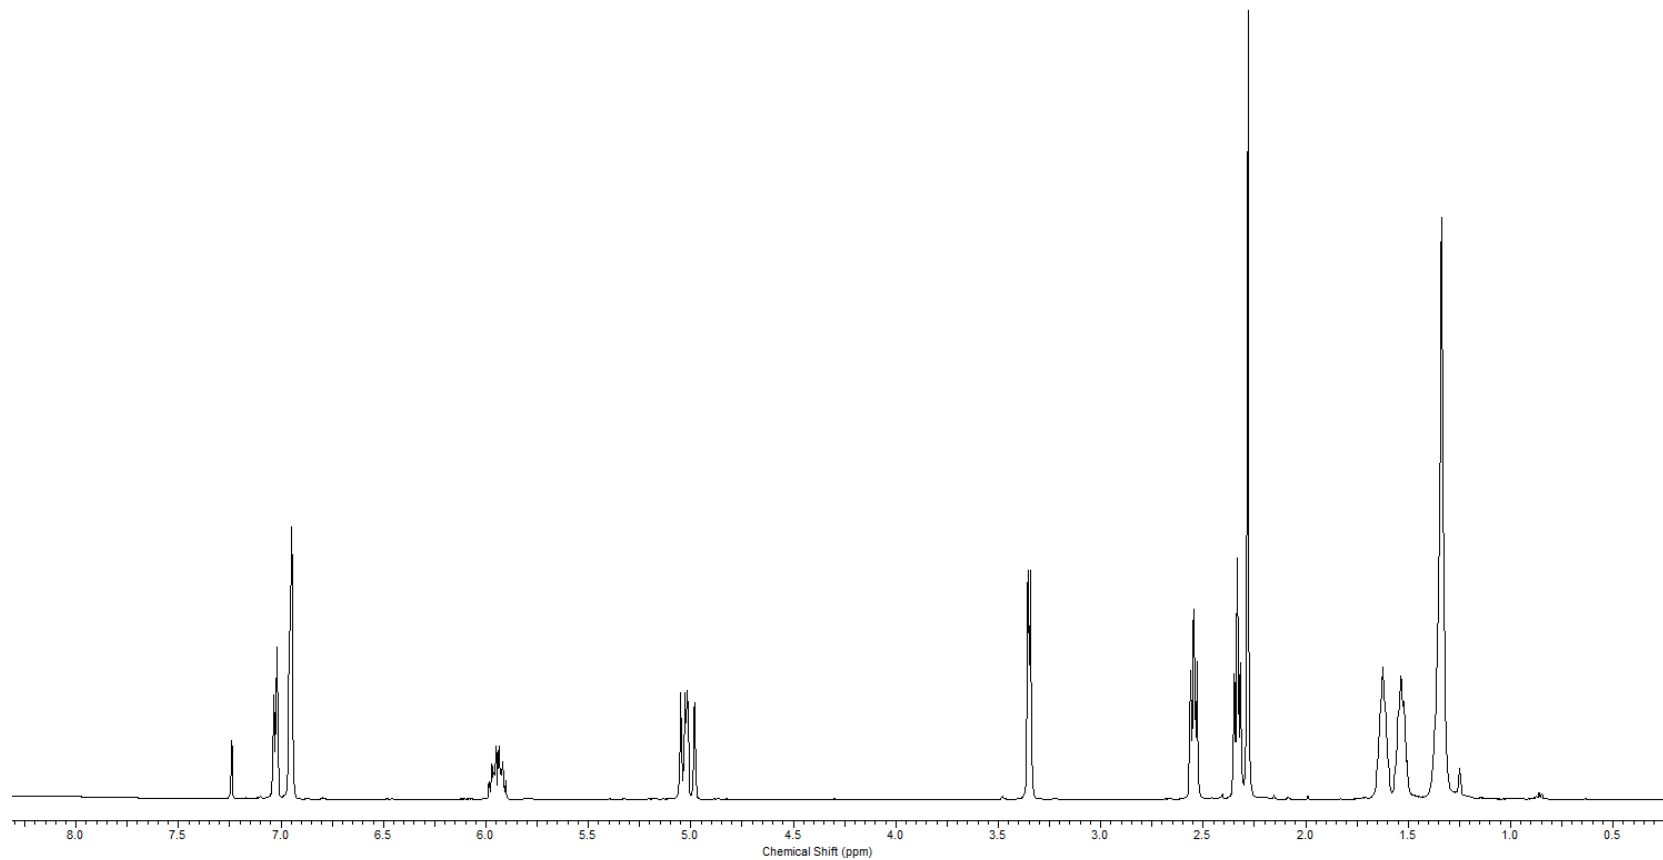

Figure S2.  $^{13}\text{C}$  NMR (125 MHz,  $\text{CDCl}_3$ ) of 1.

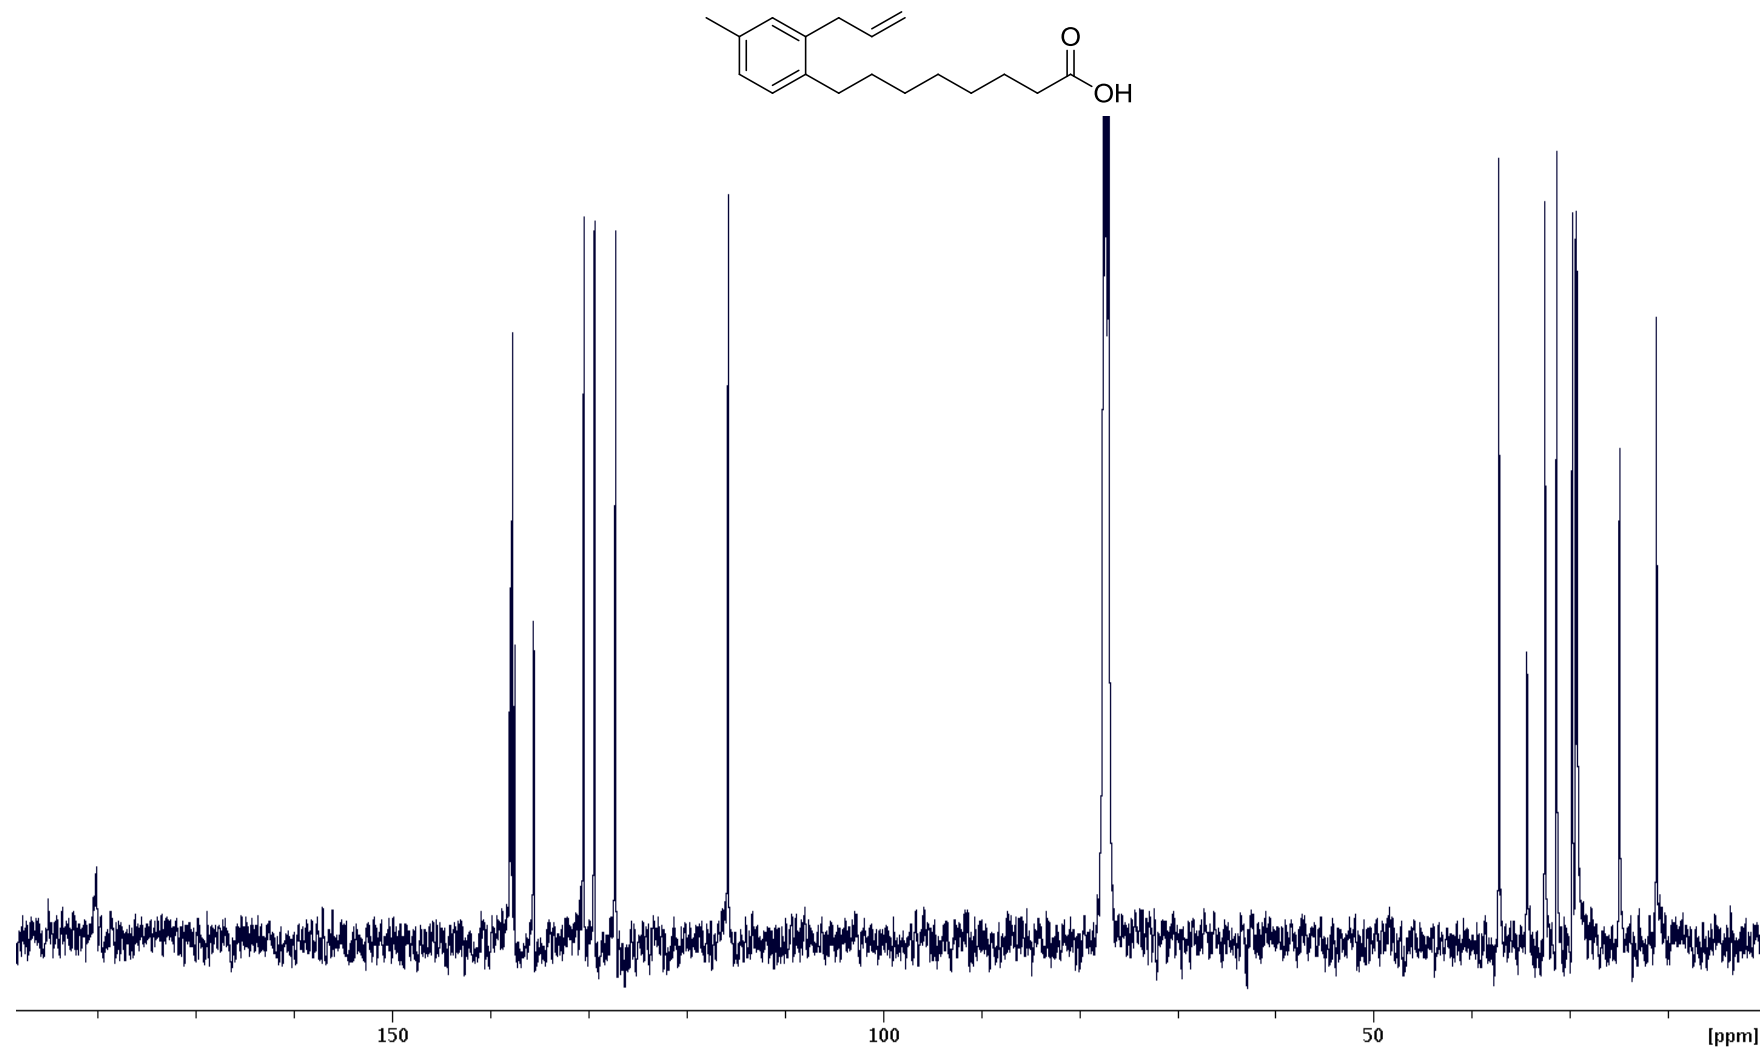

Figure S3. gCOSY (600 MHz, CDCl<sub>3</sub>) of 1.

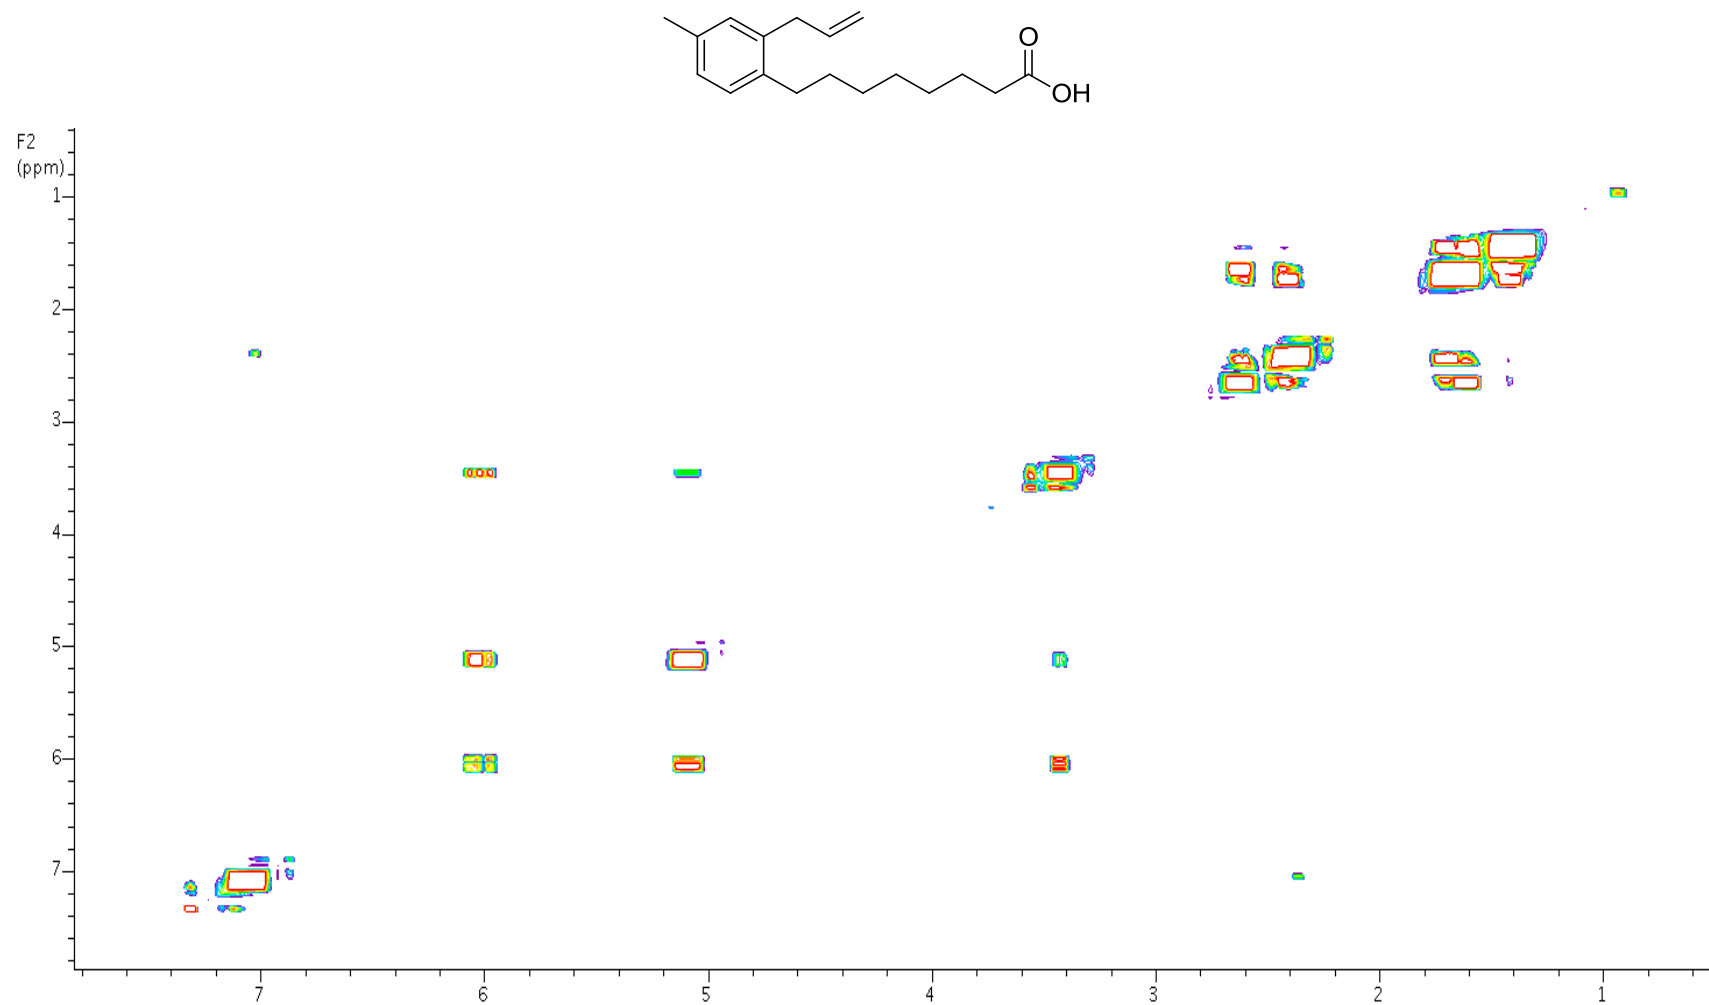

**Figure S4.** gHSQC (600 MHz, CDCl<sub>3</sub>) of **1**.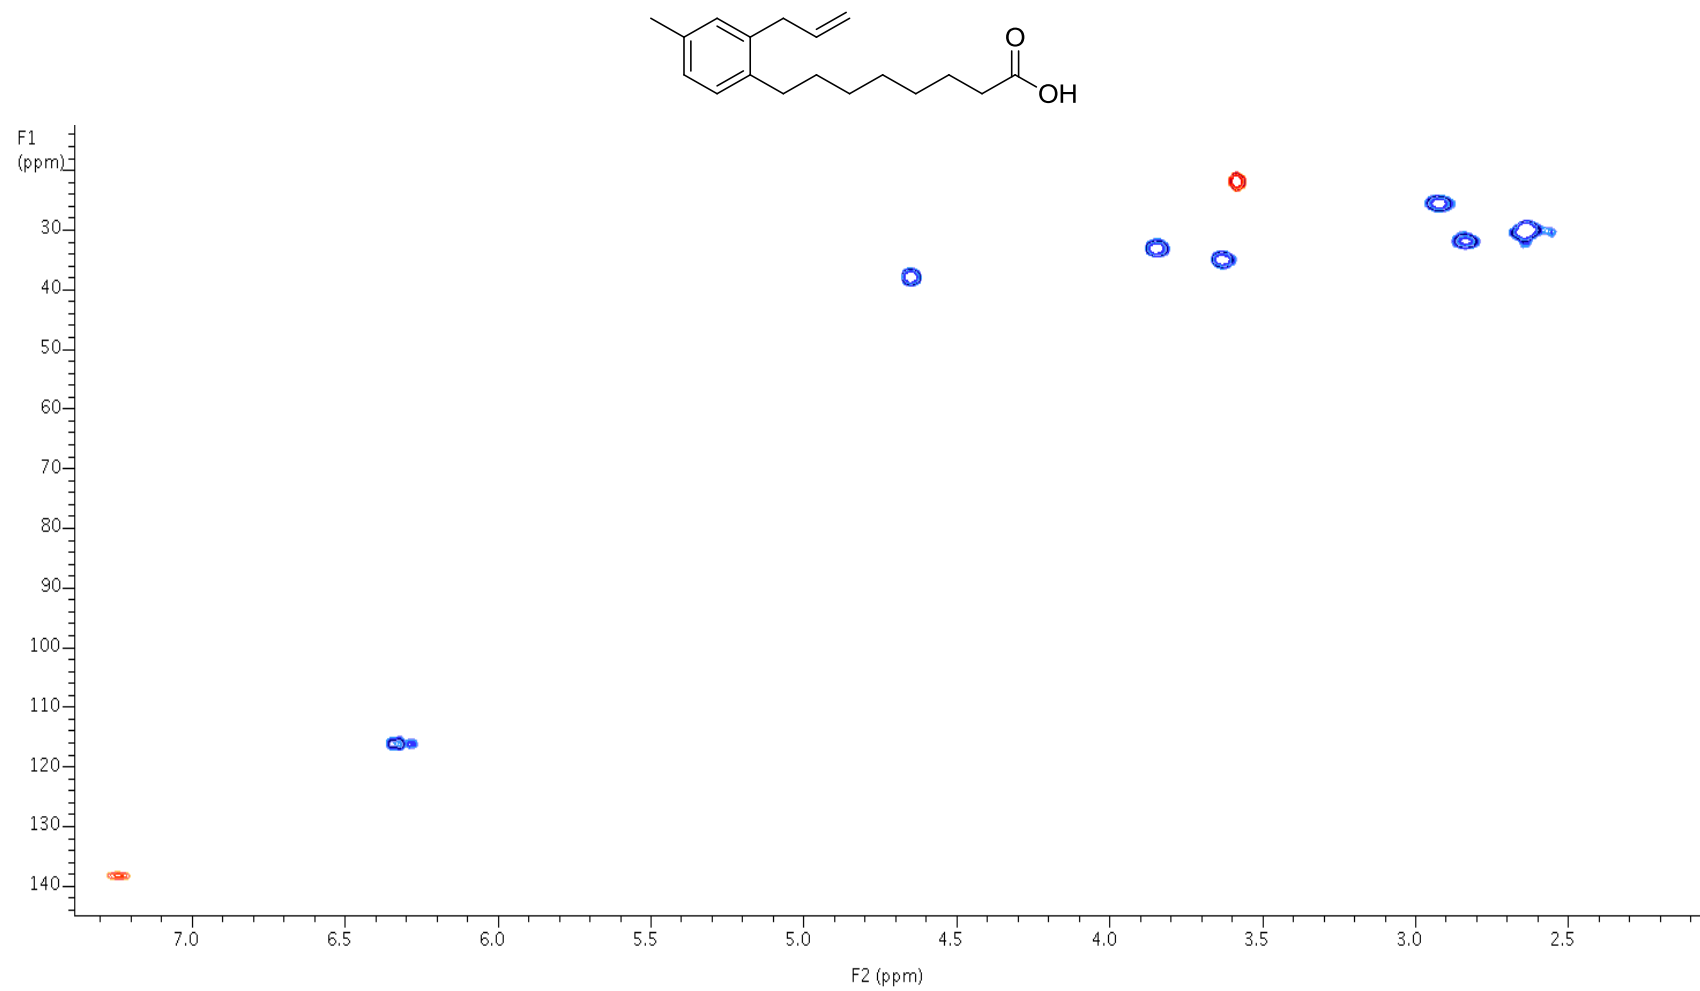

Figure S5. gHMBC (600 MHz, CDCl<sub>3</sub>) of **1**.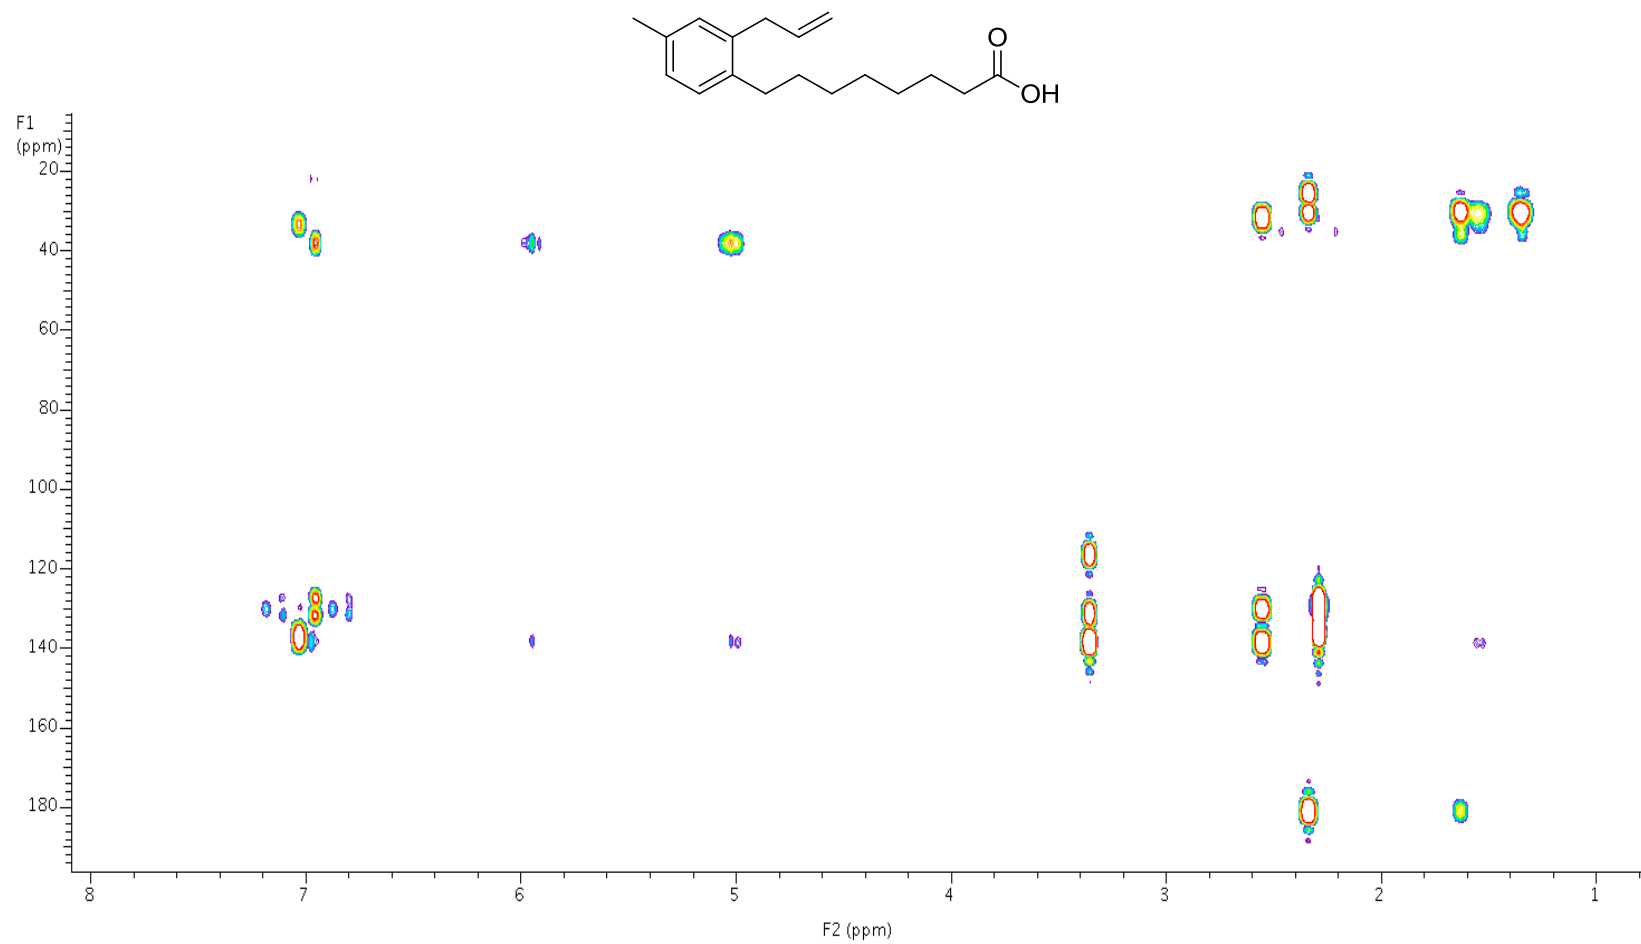



**Figure S7.**  $^{13}\text{C}$ - $^{13}\text{C}$  COSY (125 MHz,  $\text{CDCl}_3$ ) of  $^{13}\text{C}$ -labeled **1**.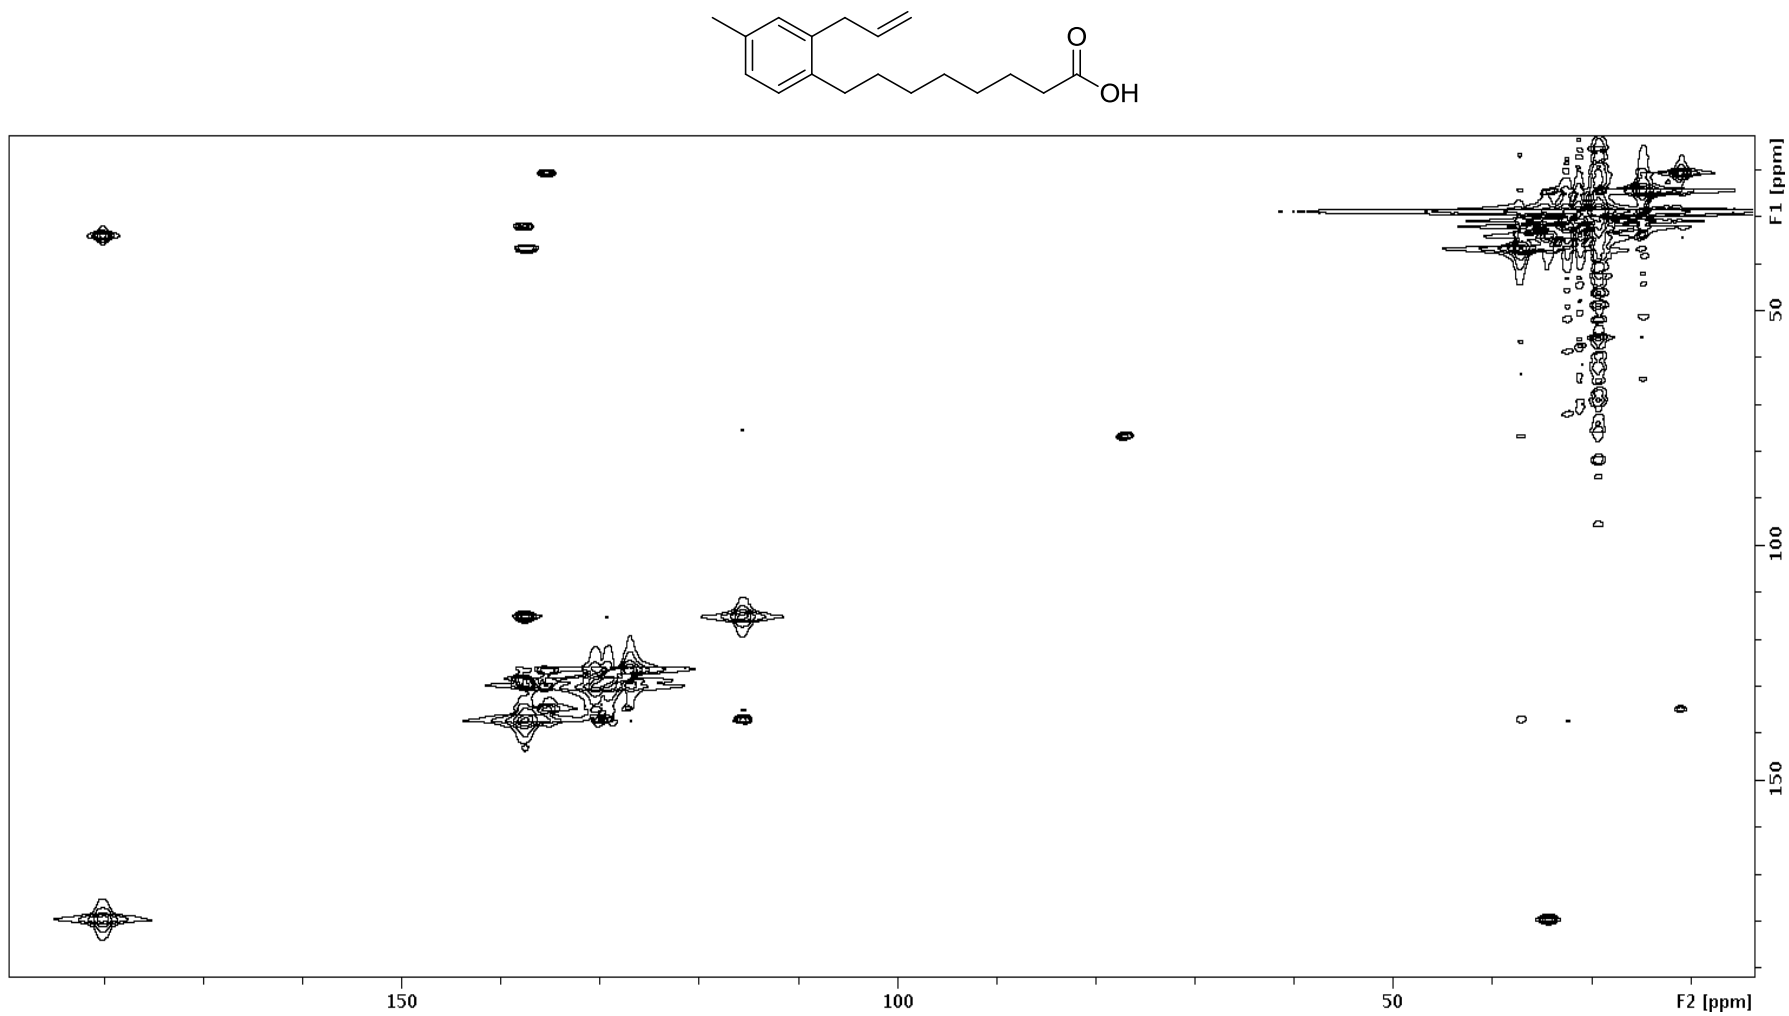

Figure S8. HRMS of 1.

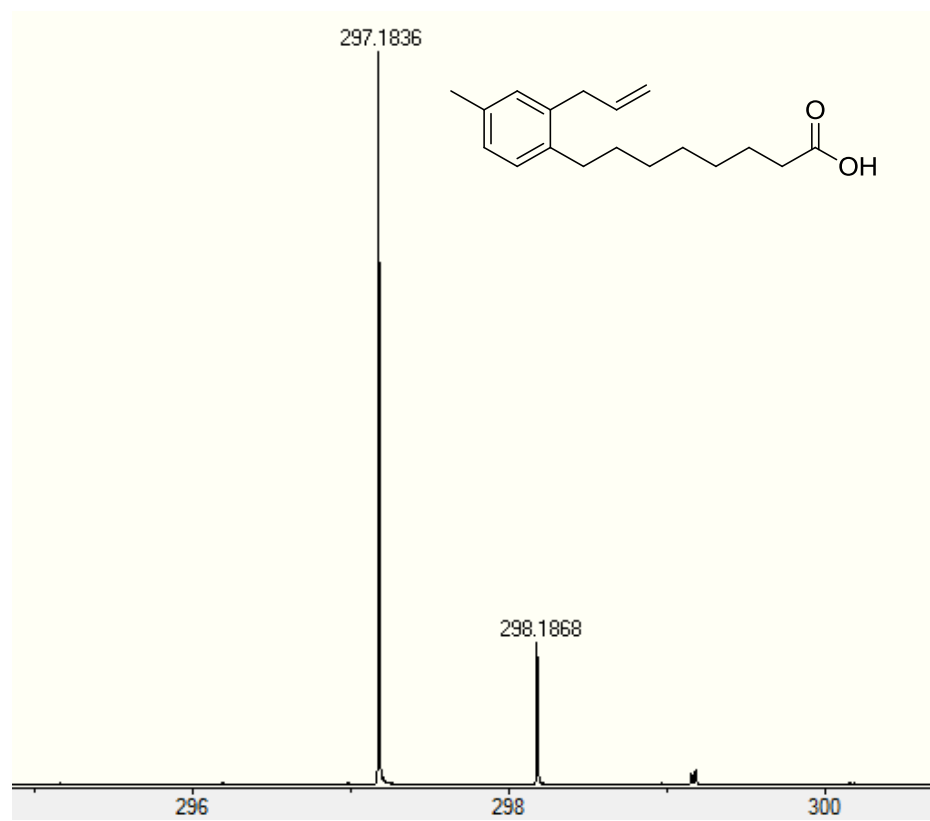



Figure S9.  $^1\text{H}$  NMR (600 MHz,  $\text{CDCl}_3$ ) of 2.

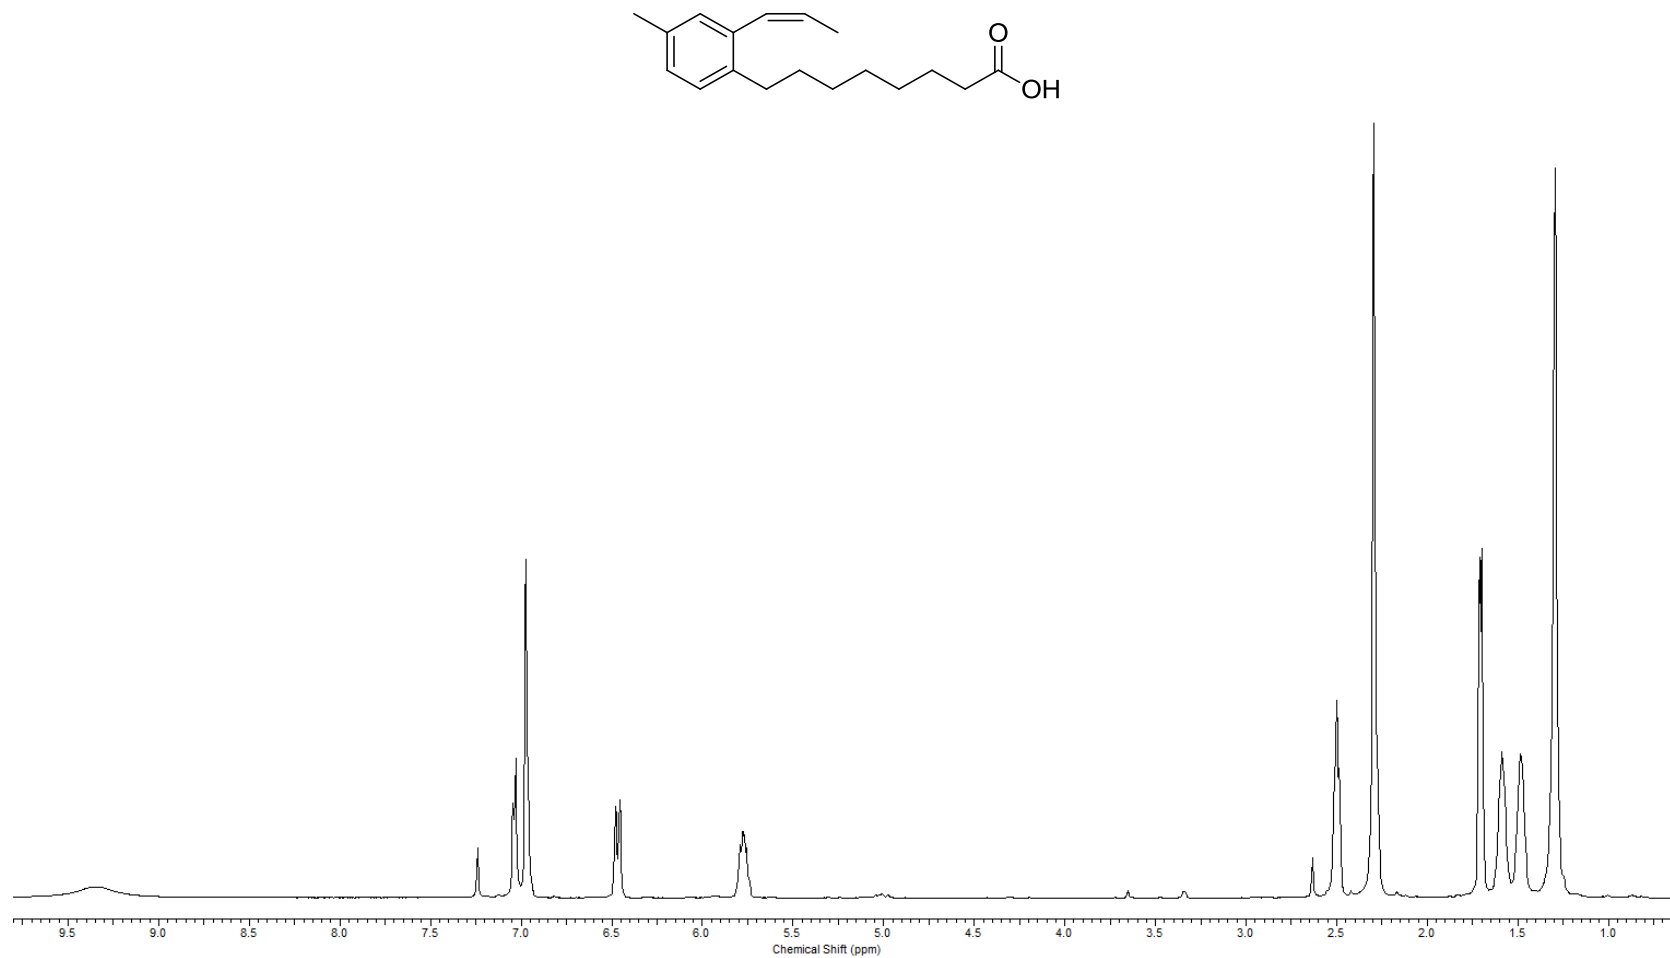

Figure S10.  $^{13}\text{C}$  NMR (125 MHz,  $\text{CDCl}_3$ ) of 2.

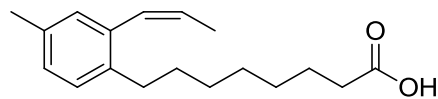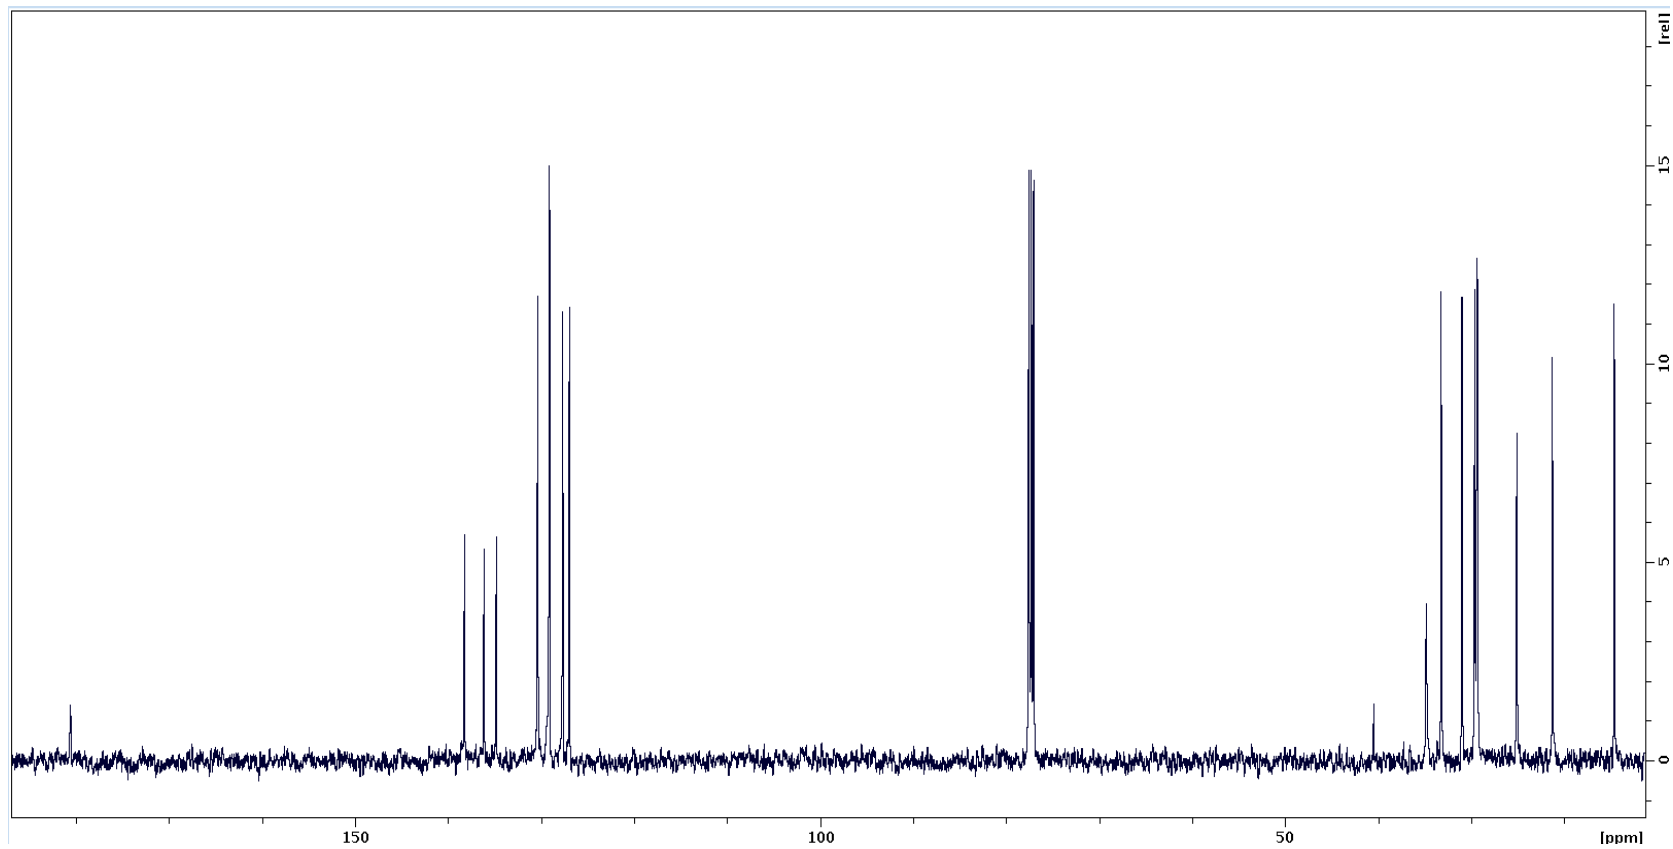

**Figure S11.** gCOSY (600 MHz, CDCl<sub>3</sub>) of **2**.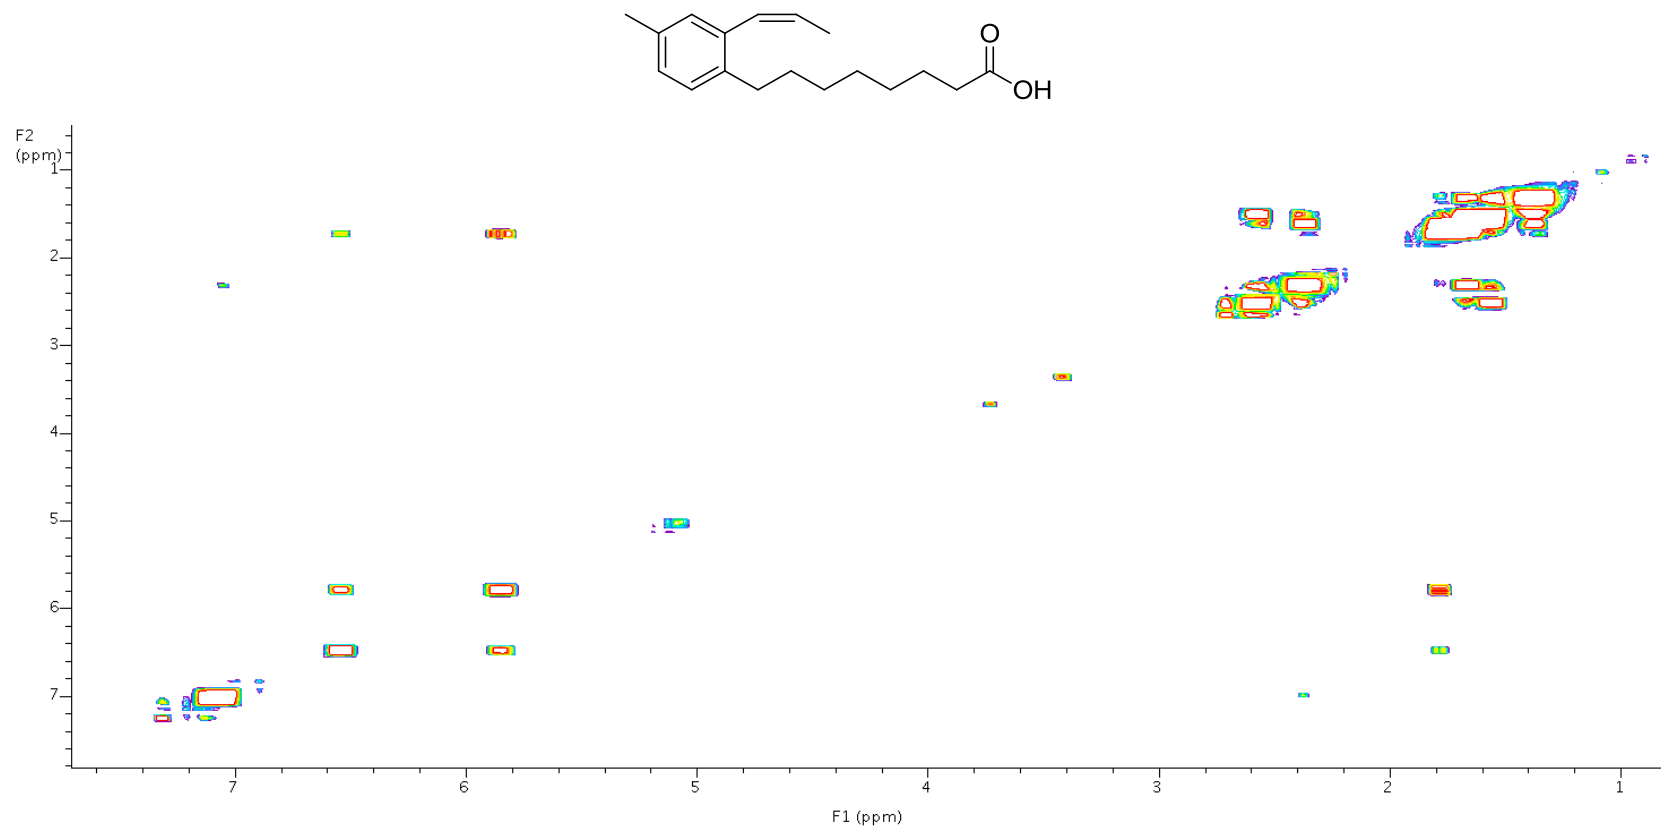

**Figure S12.** gHSQC (600 MHz, CDCl<sub>3</sub>) of **2**.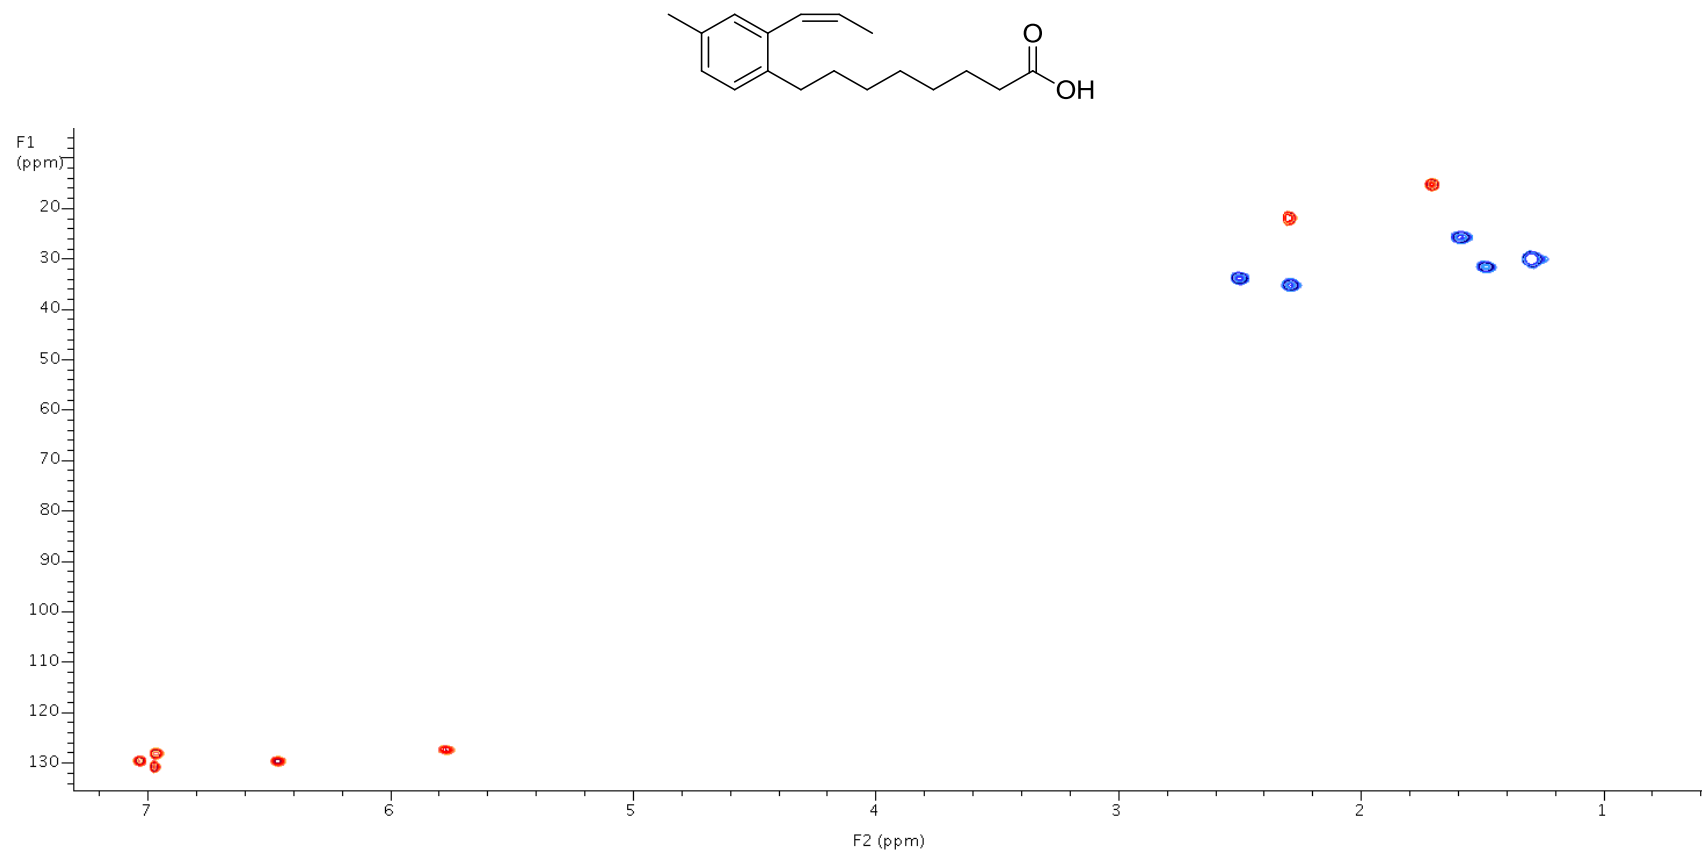

Figure S13. gHMBC (600 MHz, CDCl<sub>3</sub>) of 2.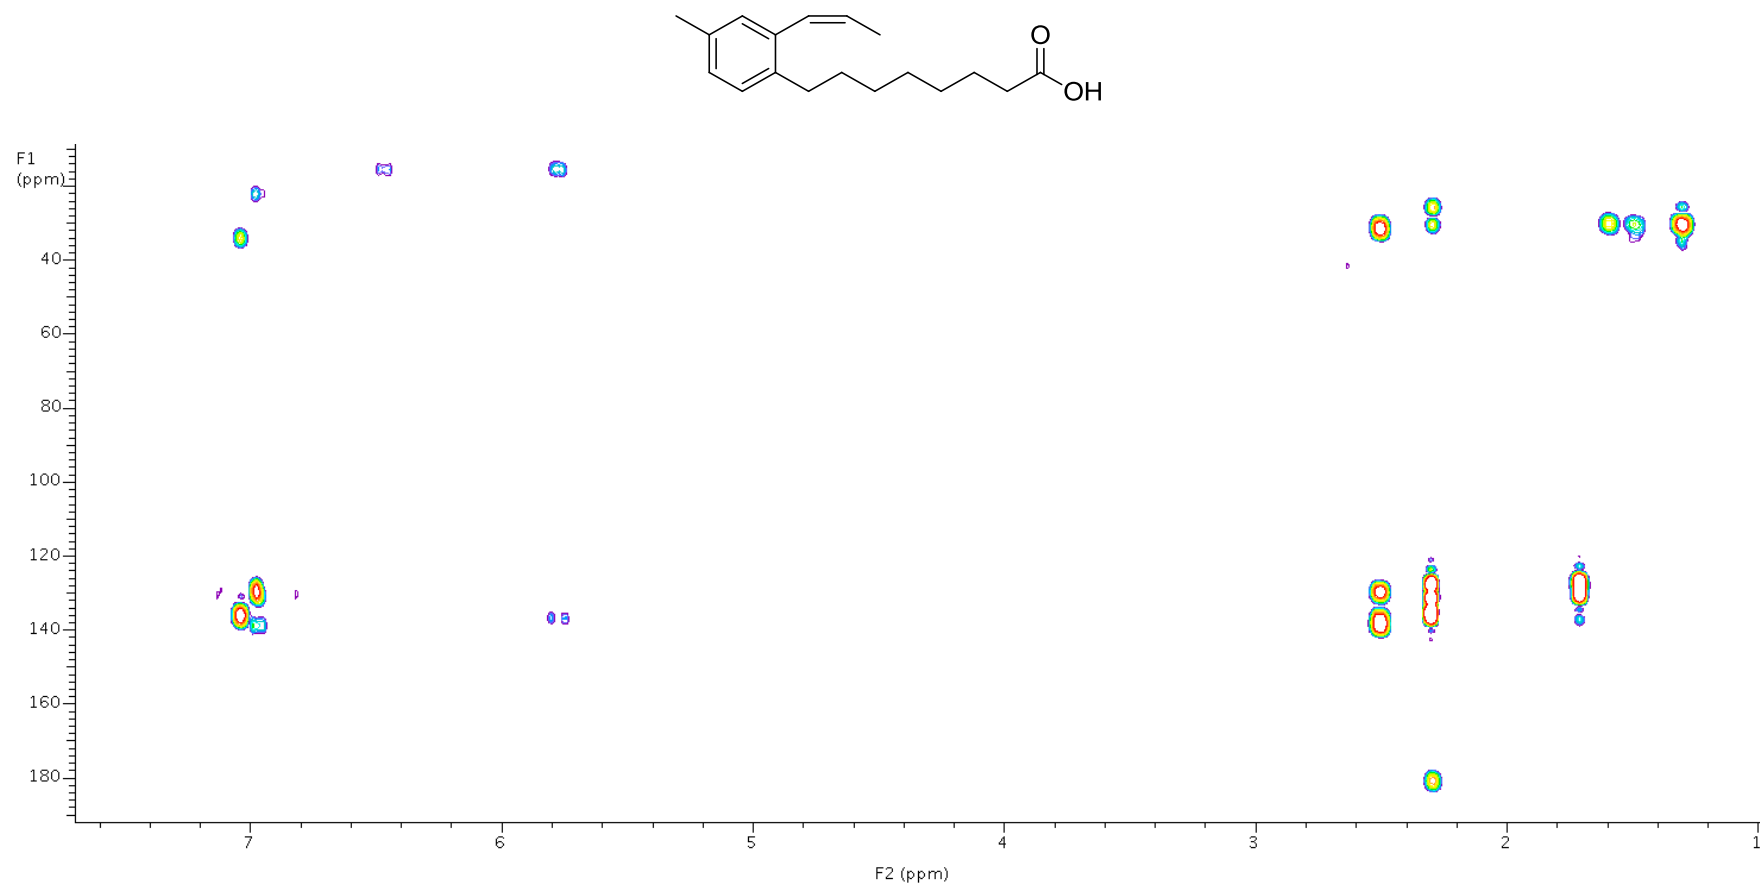

**Figure S14.**  $^{13}\text{C}$  NMR (125 MHz,  $\text{CDCl}_3$ ) of  $^{13}\text{C}$ -labeled 2.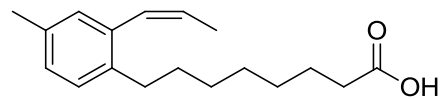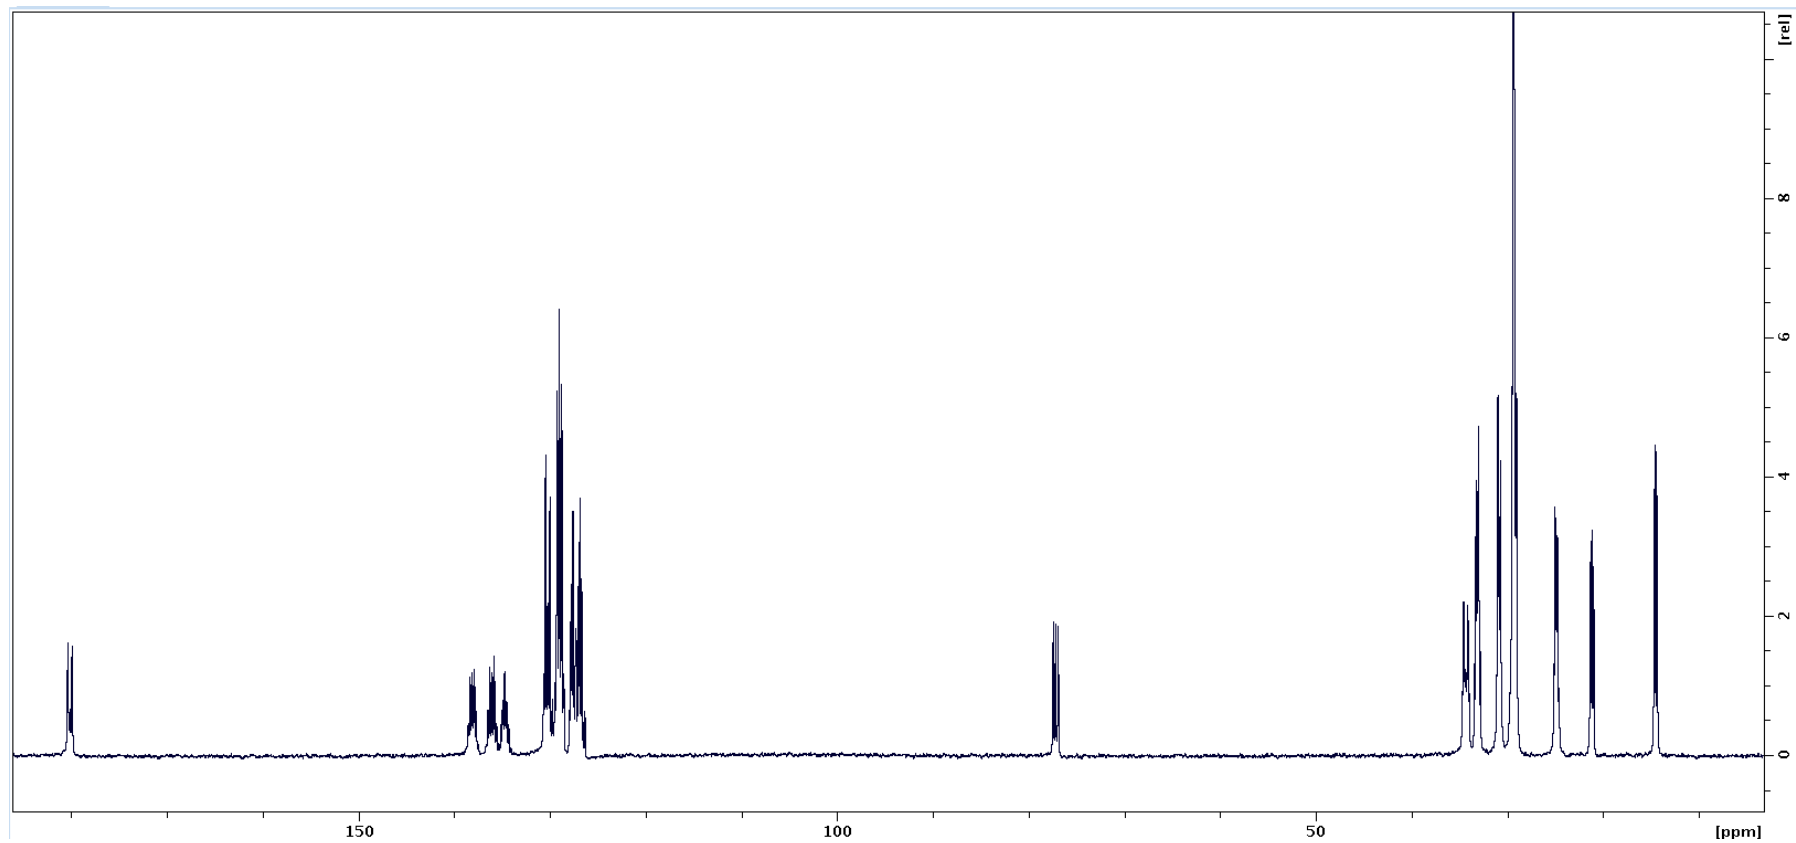

**Figure S15.**  $^{13}\text{C}$ - $^{13}\text{C}$  COSY (125 MHz,  $\text{CDCl}_3$ ) of  $^{13}\text{C}$ -labeled **2**.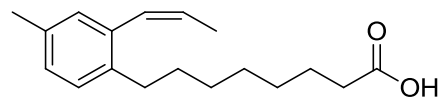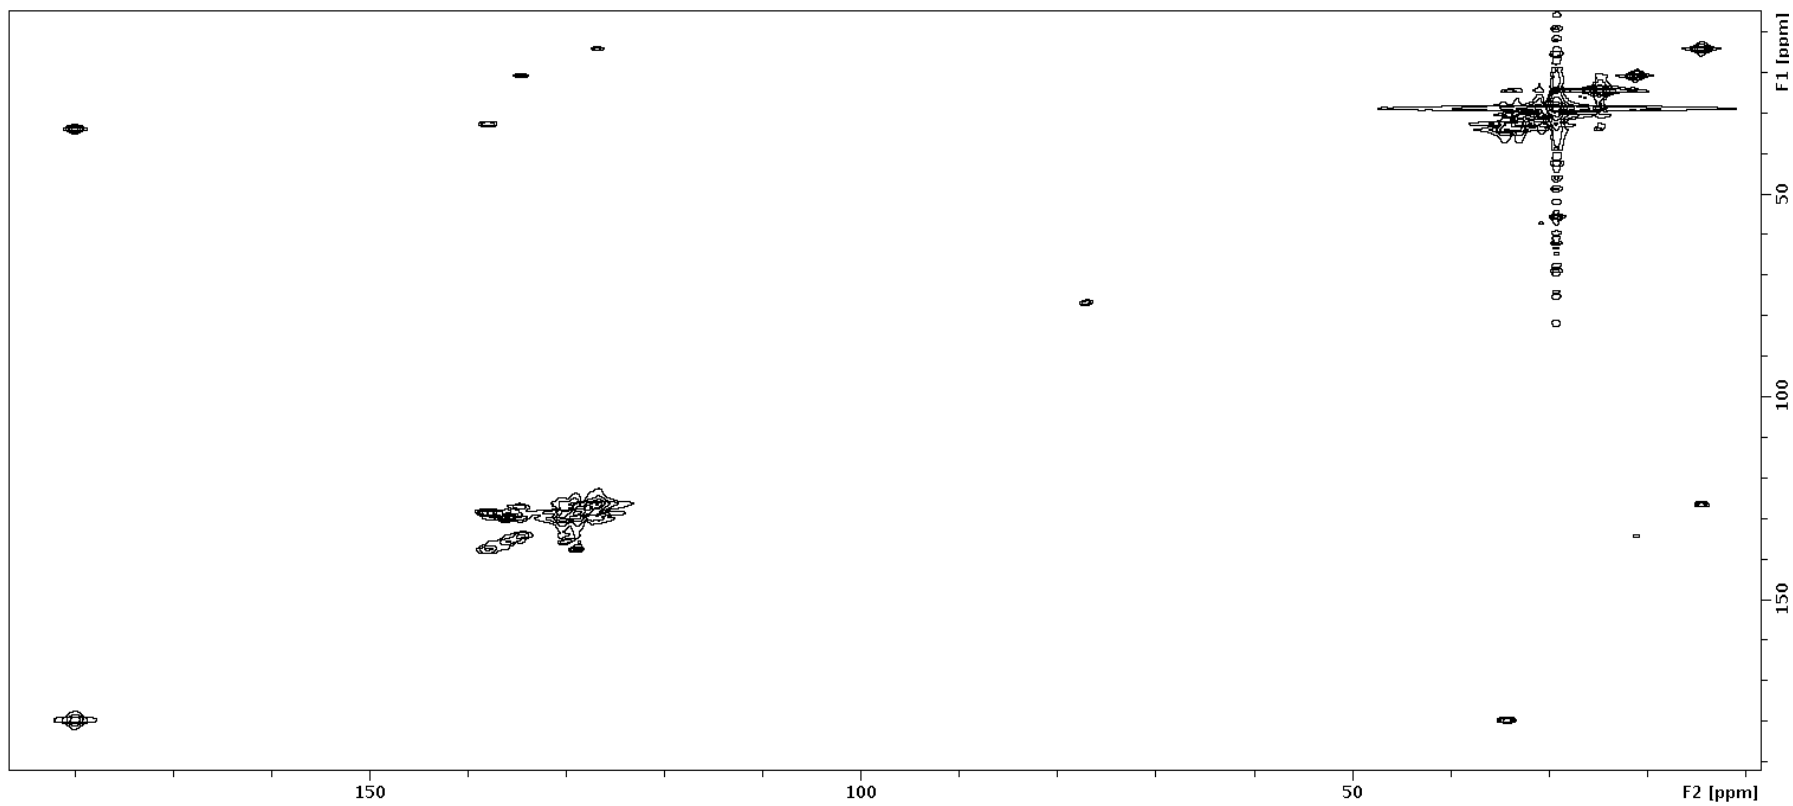

Figure S16. HRMS of 2.

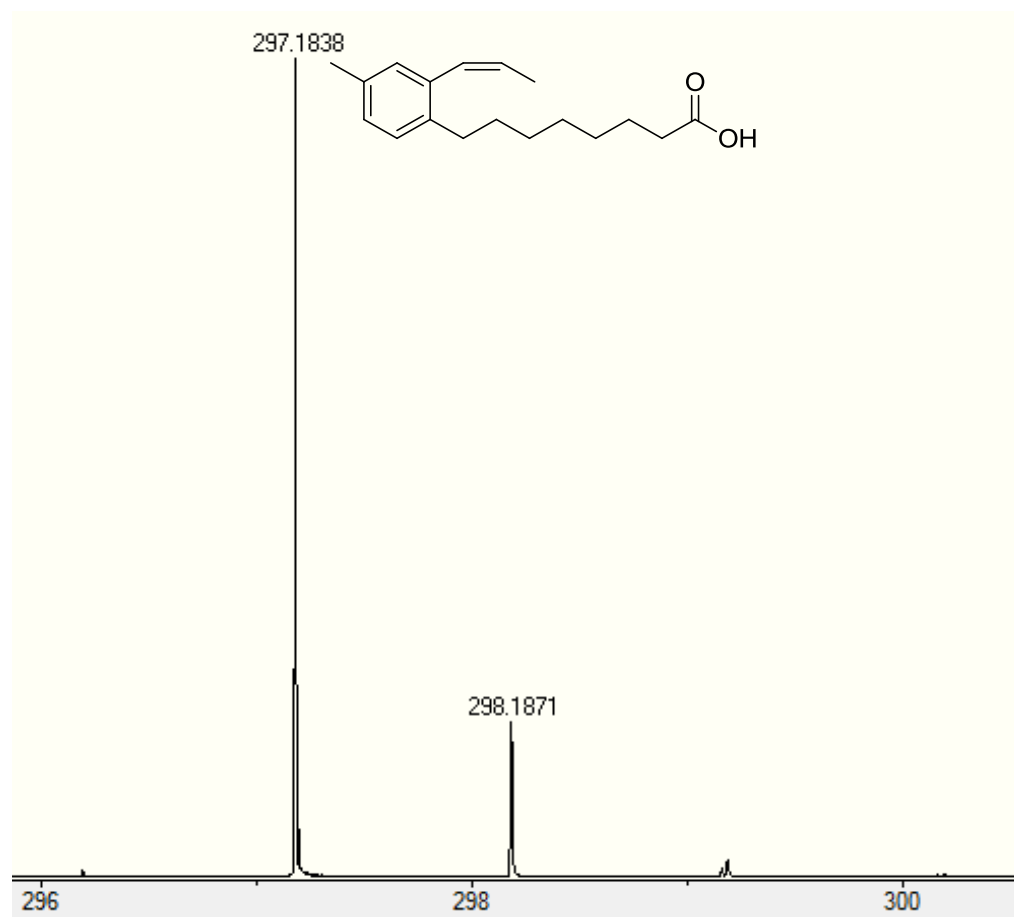



**Figure S17.**  $^{13}\text{C}$ - $^{13}\text{C}$  gCOSY calculations.

1. During  $t_1$ , each new fid increments  $t_1$  by a dwell time of  $dw1 = \frac{1}{sw1}$  (always true for each complex pair of FIDs, independent of type of acquisition, such as States or TPPI, etc.). For a  $^{13}\text{C}$ - $^{13}\text{C}$  cosy,  $sw = sw1 \leq 220\text{ppm}$ , which =  $125\text{Hz/ppm} \times 220\text{ppm} = 27.5\text{kHz}$ . Thus,  $dw1 = 1/27.5\text{kHz} = 36.4\mu\text{s}$ .
2. For  $J_{\text{CC}}$  ranging 30 to 60 Hz, maximum polarization transfer (largest crosspeak formation) will occur at  $1/2J = 33$  to 17 ms, respectively.
3. For an absolute-value cosy, where a sinebell or sinebell-squared apodization is applied, maximum crosspeaks (100% of the size of the  $^1\text{H}$  1D peak) will occur with a total acquisition time in the indirect dimension,  $at1 = 1/J$ , because sinebell-type functions are maximum at  $1/2$  the FID. So for maximum crosspeaks, the  $t_1$  evolution would be at  $at1 = 66$  to 33 ms, for  $J_{\text{CC}} = 30$  to 60 Hz.
4. The total acquisition time in the indirect dimension equals the number of increments times the time per increment, or:  $at1 = ni \times dw1$  Thus:  $ni \equiv \text{TD1} = \frac{at1}{dw1} = \frac{sw1}{J_{\text{CC}}} = 917$  to 458 .  
Even smaller values (e.g., 256) can be used without much loss in sensitivity, since the crosspeaks intensities will follow something close to sinusoidal behavior close to  $90^\circ$ .
5. Resolution: If  $ni \equiv \text{TD1} = 400$ , then  $sw1/ni = 27500/400 = 69 \text{ Hz} = 0.55 \text{ ppm @ } 500 \text{ MHz}$ .

**Figure S18.**  $^{13}\text{C}$ - $^{13}\text{C}$  COSY pulse program (Bruker).

```

;cosygpqf - modified to have proton decoupling 2June2010
;avance-version (07/04/05)
;2D homonuclear shift correlation
;using gradient pulses for selection
;
;$CLASS=HighRes
;$DIM=2D
;$TYPE=
;$SUBTYPE=
;$COMMENT=

#include <Avance.incl>
#include <Grad.incl>

"d13=4u"

"d11=30m"

"in0=inf1"

"d0=3u"

1 ze
d11 pl12:f2
2 30m do:f2
d1 cpd2:f2
3 p1 ph1
d0
50u UNBLKGRAD
p16:gp1
d16
p0 ph2

p16:gp1
d16
4u BLKGRAD
go=2 ph31
30m do:f2 pl12:f2 mc #0 to 2 F1QF(id0)
exit

ph1=0 2
ph2=0 0 2 2
ph31=0 2

;p1 : f1 channel - power level for pulse (default)
;p0 : f1 channel - 20 to 90 degree high power pulse
;p1 : f1 channel - 90 degree high power pulse
;p16: homospoil/gradient pulse
;d0 : incremented delay (2D) [3 usec]
;d1 : relaxation delay; 1-5 * T1
;d13: short delay [4 usec]
;d16: delay for homospoil/gradient recovery
;inf1: 1/SW = 2 * DW
;in0: 1/(1 * SW) = 2 * DW
;nd0: 1
;NS: 1 * n
;DS: 16
;td1: number of experiments
;FnMODE: QF

;use gradient ratio: gp 1
; 10
;for z-only gradients:
;gpz1: 10%
;use gradient files:
;gpnam1: SINE.100
;$Id: cosygpqf,v 1.5 2007/04/11 13:34:29 ber Exp $

```

**Figure S19.**  $^{13}\text{C}$ - $^{13}\text{C}$  COSY for Varian.

To set up a  $^{13}\text{C}$ - $^{13}\text{C}$  gCOSY on a Varian spectrometer with VNMR software, complete the following steps:

1. Set up (and acquire) a 1D  $^{13}\text{C}$  spectrum with the desired parameters (sweep width, *etc.*) for your particular compound.
2. In the same experiment, set up a gCOSY (type **gCOSY**)
3. Your transmitter nucleus (**tn**) should be **C13**, and decoupler nucleus (**dn**) should be **H1**.
4. Type **dm** = '**nny**'

Set number of transients and increments (**nt**, **ni**) as necessary for your compound

To set up a  $^{13}\text{C}$ - $^{13}\text{C}$  gCOSY on a Varian spectrometer with VNMRJ software, complete the following steps:

1. Set up (and acquire) a 1D  $^{13}\text{C}$  spectrum with the desired parameters (sweep width, *etc.*) for your particular compound.
2. In a different experiment, set up a gCOSY (type **Gcosy**)
3. Change transmitter nucleus (**tn**) to **C13**, and decoupler nucleus (**dn**) should be **H1**.
4. Type **dm** = '**nny**'
5. Change sweep width (**sw**) and **sw1** to sweep width from 1D  $^{13}\text{C}$  spectrum.
6. Set number of transients and increments (**nt**, **ni**) as necessary for your compound.

Set remaining parameters as the following:

| ACQUISITION    |         | TRANSMITTER |         | GRADIENTS |             | PROCESSING    |          |
|----------------|---------|-------------|---------|-----------|-------------|---------------|----------|
| seqfil         | gCOSY   | tn          | C13     | gz1v11    | 4237        | sb            | -0.065   |
| sw             | 31446.5 | sfrq        | 125.698 | gt1       | 0.001000    | sbs           | not used |
| at             | 0.130   | tof         | 1883.3  | gstab     | 0.000500    | fn            | 8192     |
| np             | 8192    | tpwr        | 63      | hsg1v1    | 4237        | 2D PROCESSING |          |
| ss             | 8       | pw          | 11.800  | hsgt      | 0.005000    | sb1           | -0.003   |
| d1             | 4.000   | DECOUPLER   |         | FLAGS     |             | sbs1          | not used |
| nt             | 90      | dn          | H1      | hs        | nn          | proc1         | 1p       |
| ct             | 0       | dm          | nny     | sspu1     | n           | fn1           | 8192     |
| 2D ACQUISITION |         | SPECIAL     |         | SAMPLE    |             |               |          |
| sw1            | 31446.5 | temp        | 25.0    | date      | Oct 29 2012 |               |          |
| ni             | 140     | spin        | 0       | solvent   | CD300       |               |          |
| PRESATURATION  |         | gain        | 60      | sample    |             |               |          |
| satmode        | n       |             |         |           |             |               |          |

**Figure S20.** (A) List of  $^{13}\text{C}$ - $^{13}\text{C}$  correlations for **1** and **2** and (B)  $^{13}\text{C}$ - $^{13}\text{C}$  COSY (125 MHz,  $\text{CDCl}_3$ ) of **2** (aromatic region).

(A)

| <b>1</b>   | <b>2</b>     |
|------------|--------------|
| C1-C2      | C1-C2        |
| C2-C3      | C2-C3        |
| C3-C4 *    | C3-C4        |
| C8-C9      | C8-C9        |
| C9-C10     | C9-C10 ***   |
| C11-C12    | C11-C12      |
| C12-C13    | C12-C13      |
| C12-C14    | C12-C14      |
| C14-C15    | C14-C15      |
| C15-C16 ** | C16-C17 **** |
| C16-C17 ** | C17-C18      |
| C17-C18    |              |

\* Weak correlation. Confirmed by additional NMR data.  
 \*\* C15 and C17 overlap. Additional NMR confirmed connectivity.  
 \*\*\* C10 and C16 had similar chemical shifts. Additional NMR confirmed connectivity.  
 \*\*\*\* Signal partially overlapped. Additional NMR confirmed connectivity.

(B)

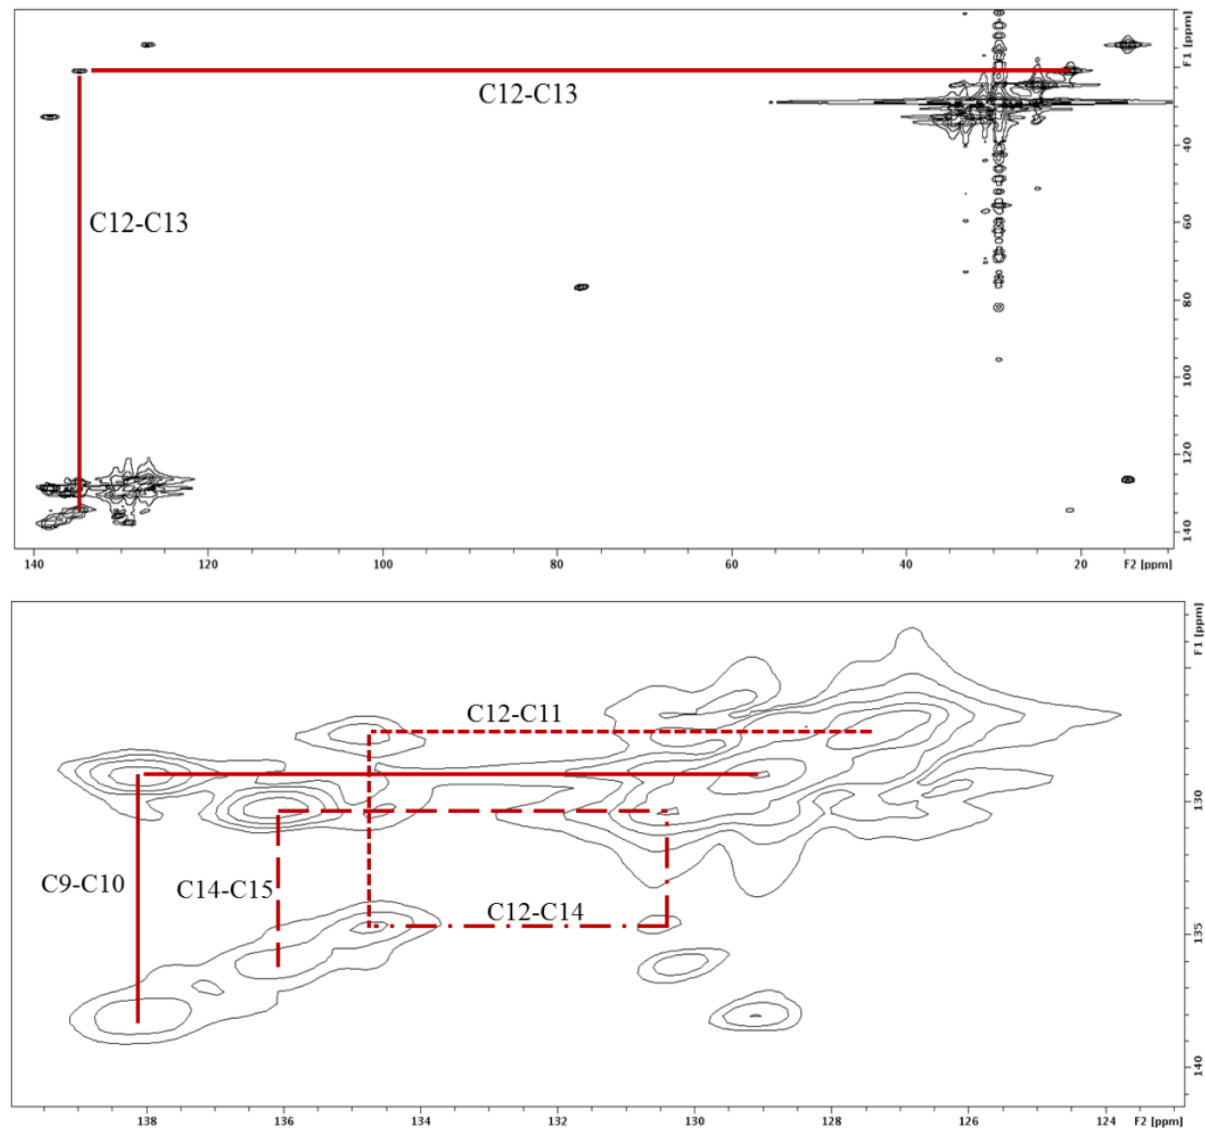

**Figure S21.** (A)  $^{13}\text{C}$ - $^{13}\text{C}$  COSY (125 MHz,  $\text{CDCl}_3$ ) and (B)  $^1\text{H}$  NMR (500 MHz,  $\text{CDCl}_3$ ) of  $^{13}\text{C}$ -labeled extract from  $\text{CHCl}_3$  partition.

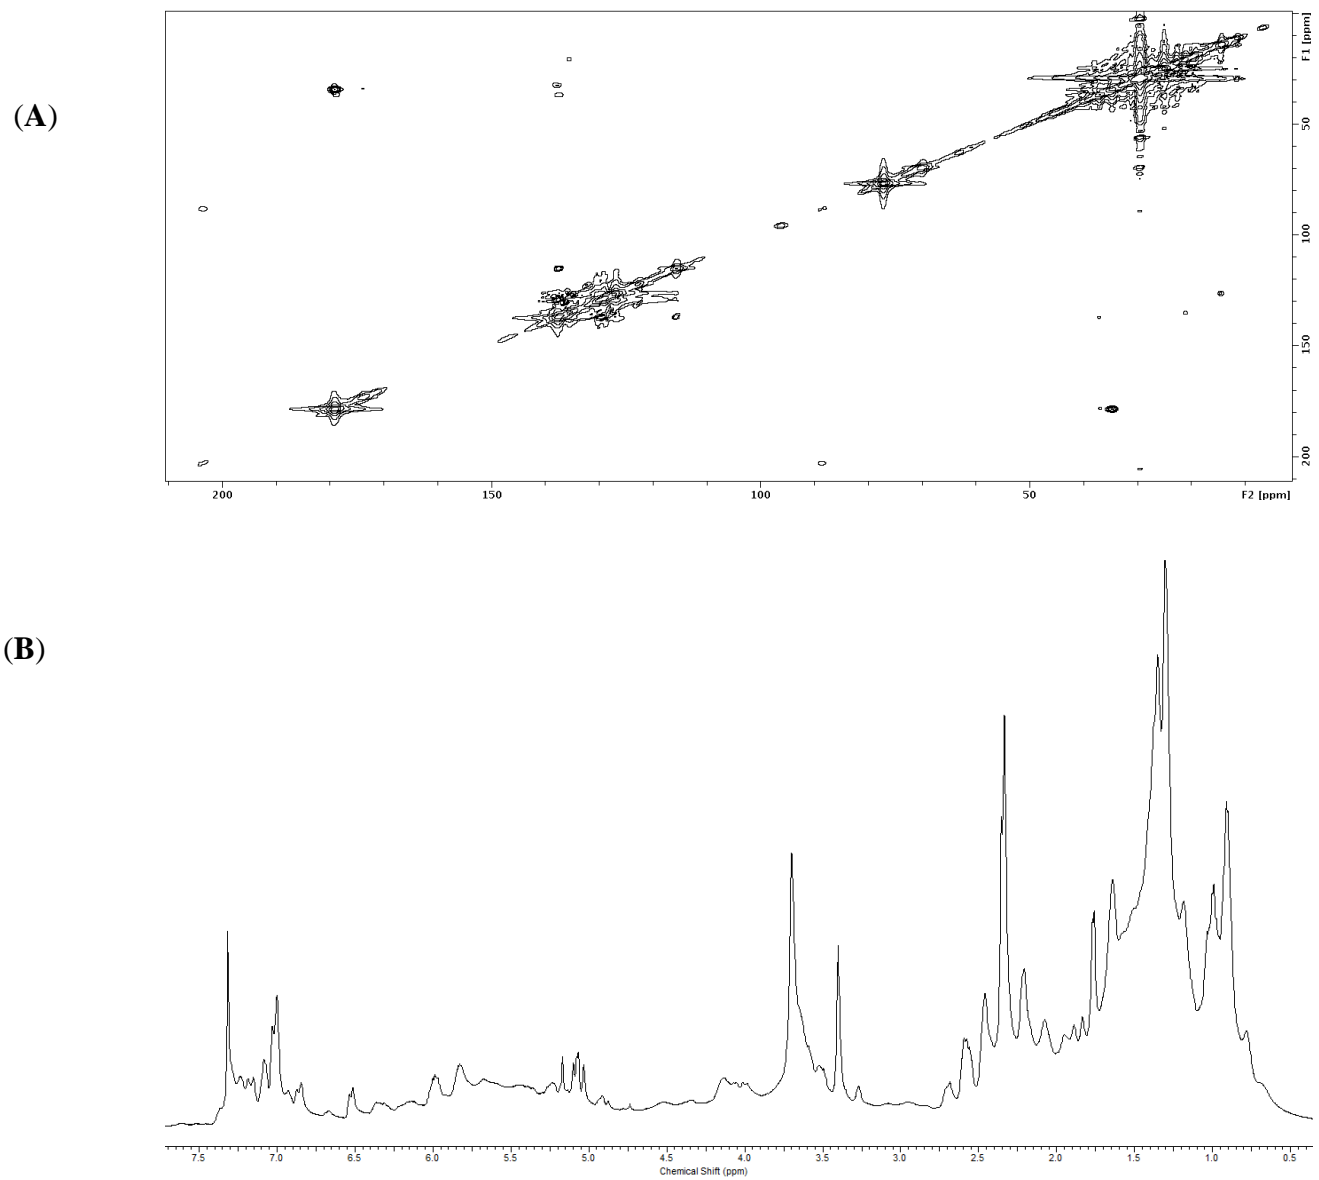

Figure S22.  $^1\text{H}$  NMR (600 MHz,  $\text{CDCl}_3$ ) of 3.

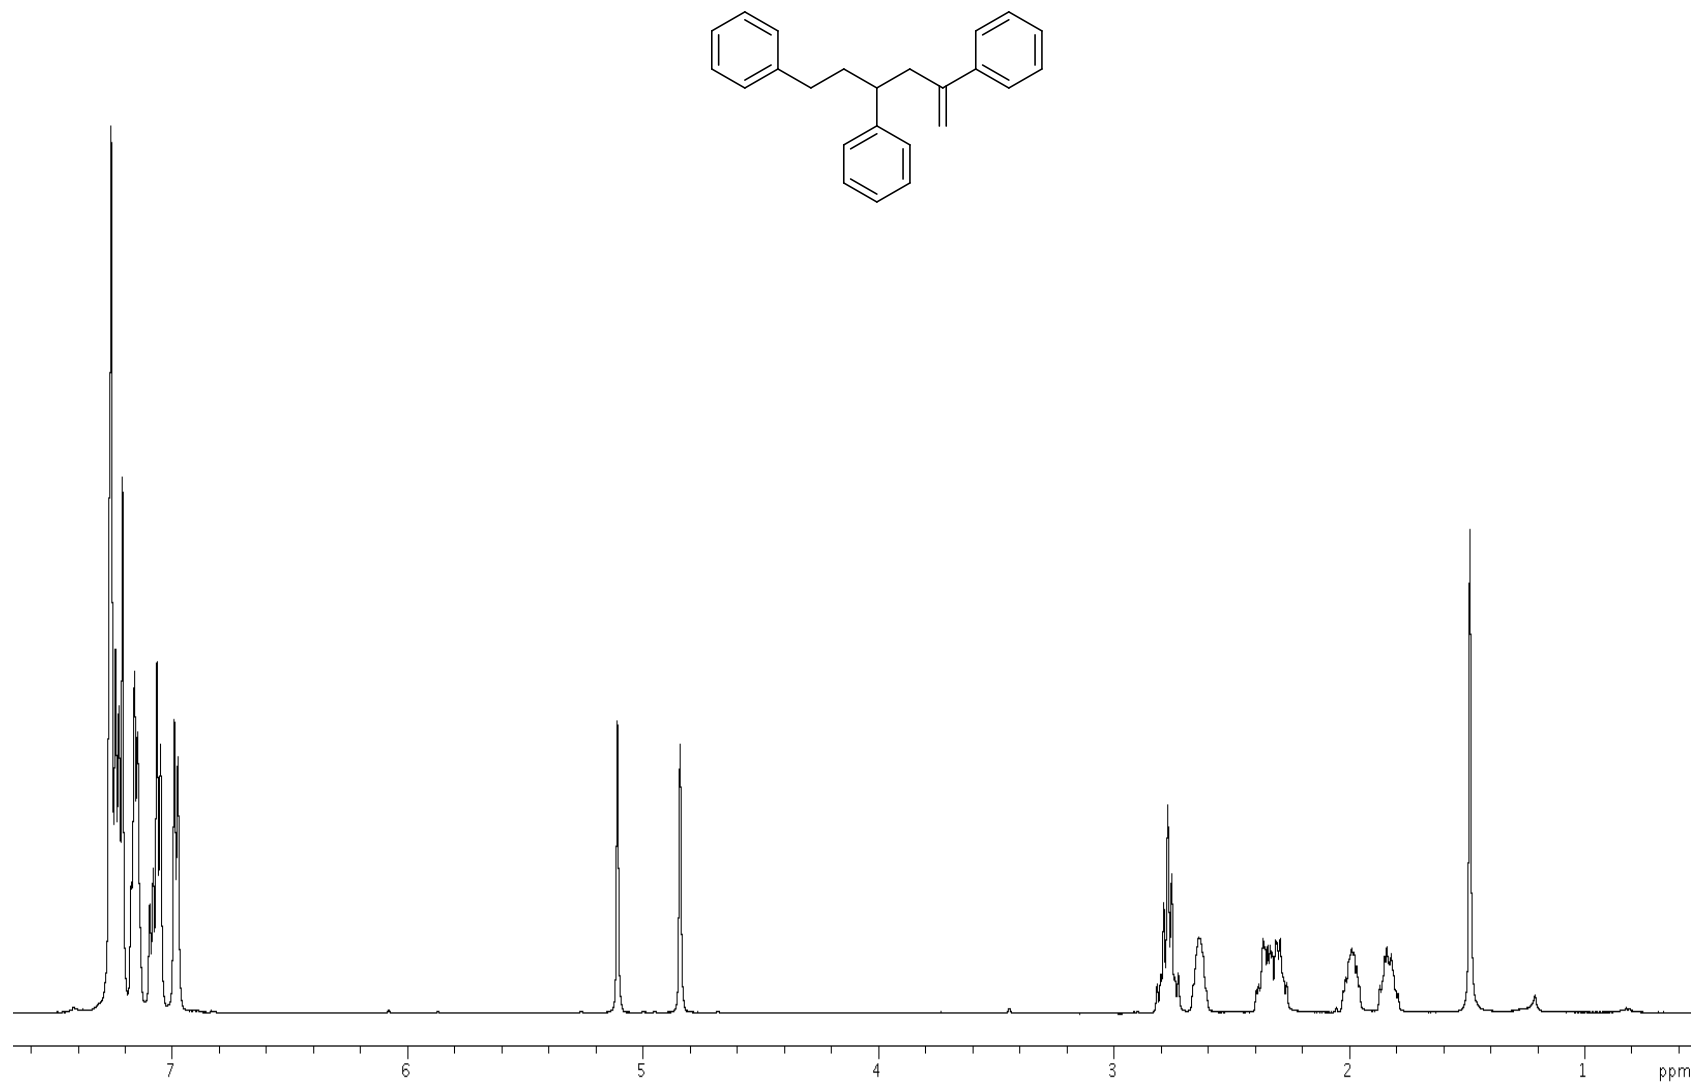

Figure S23.  $^{13}\text{C}$  NMR (125 MHz,  $\text{CDCl}_3$ ) of 3.

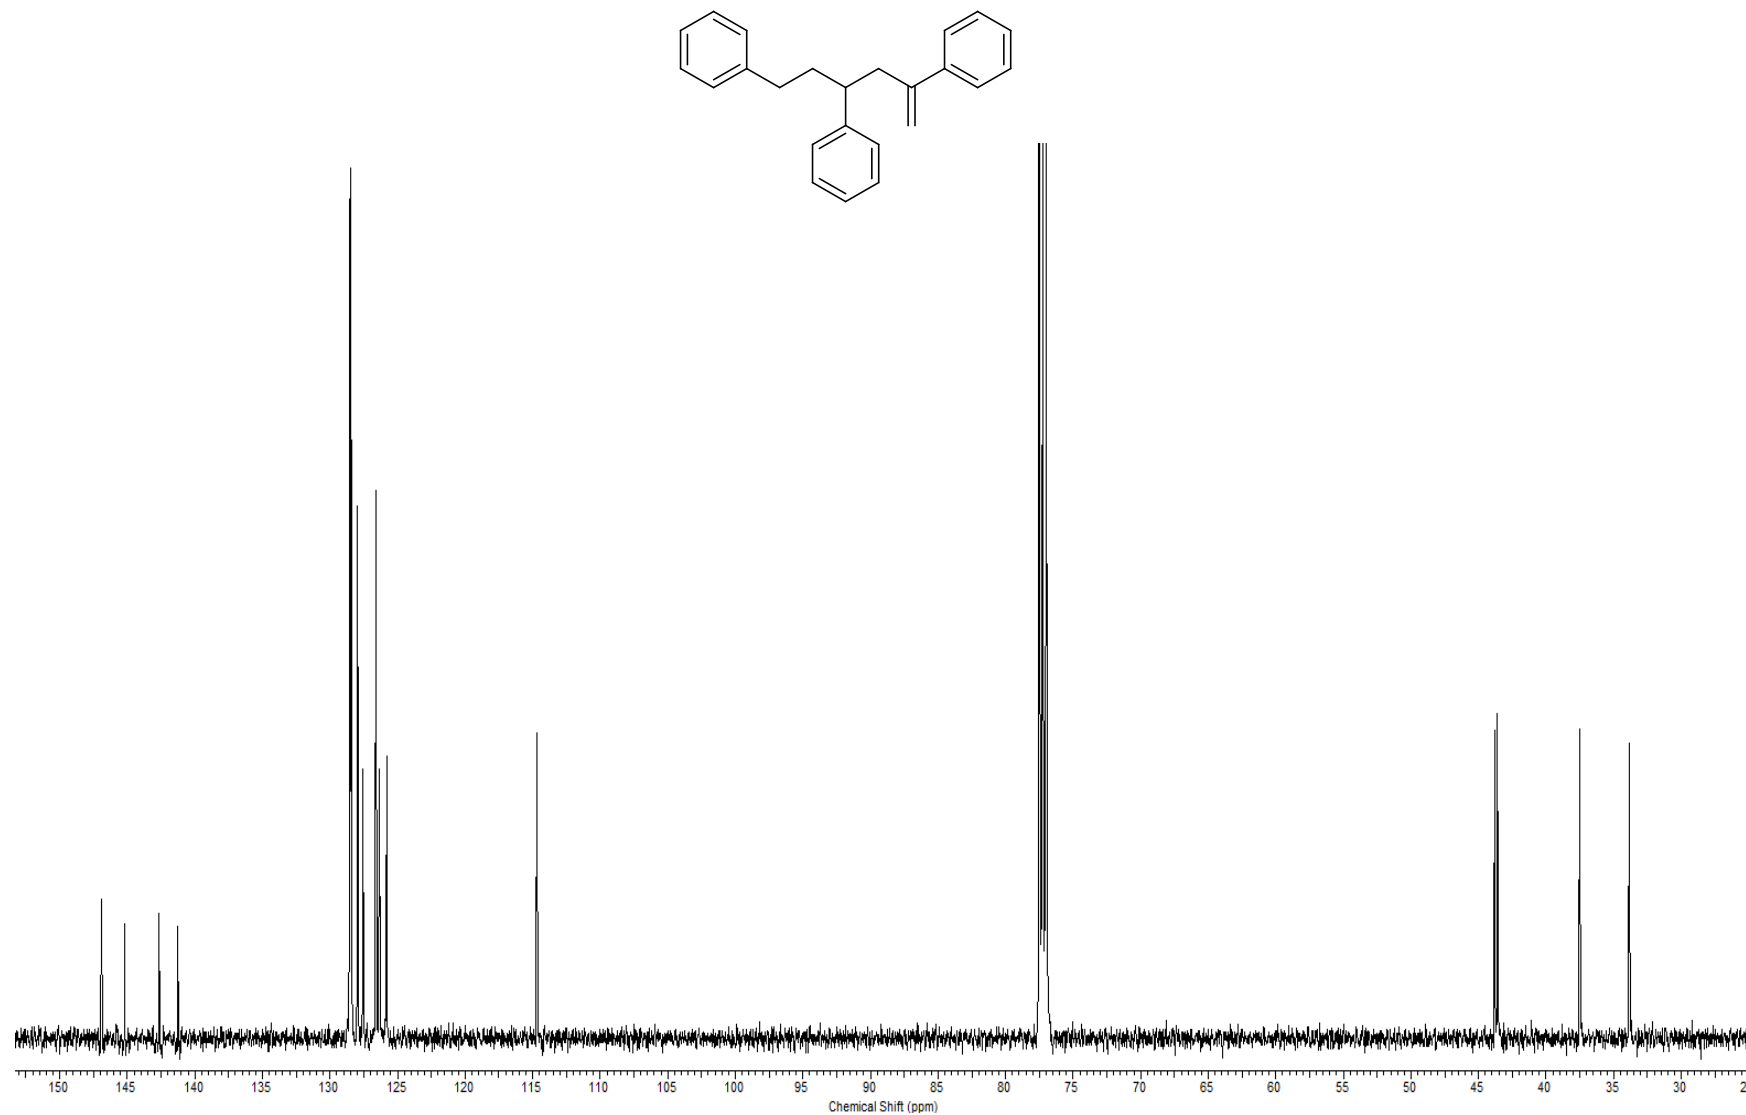

Figure S24. HRMS of 3.

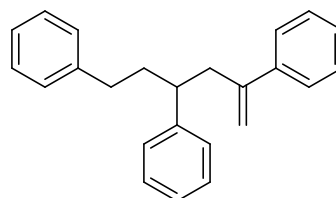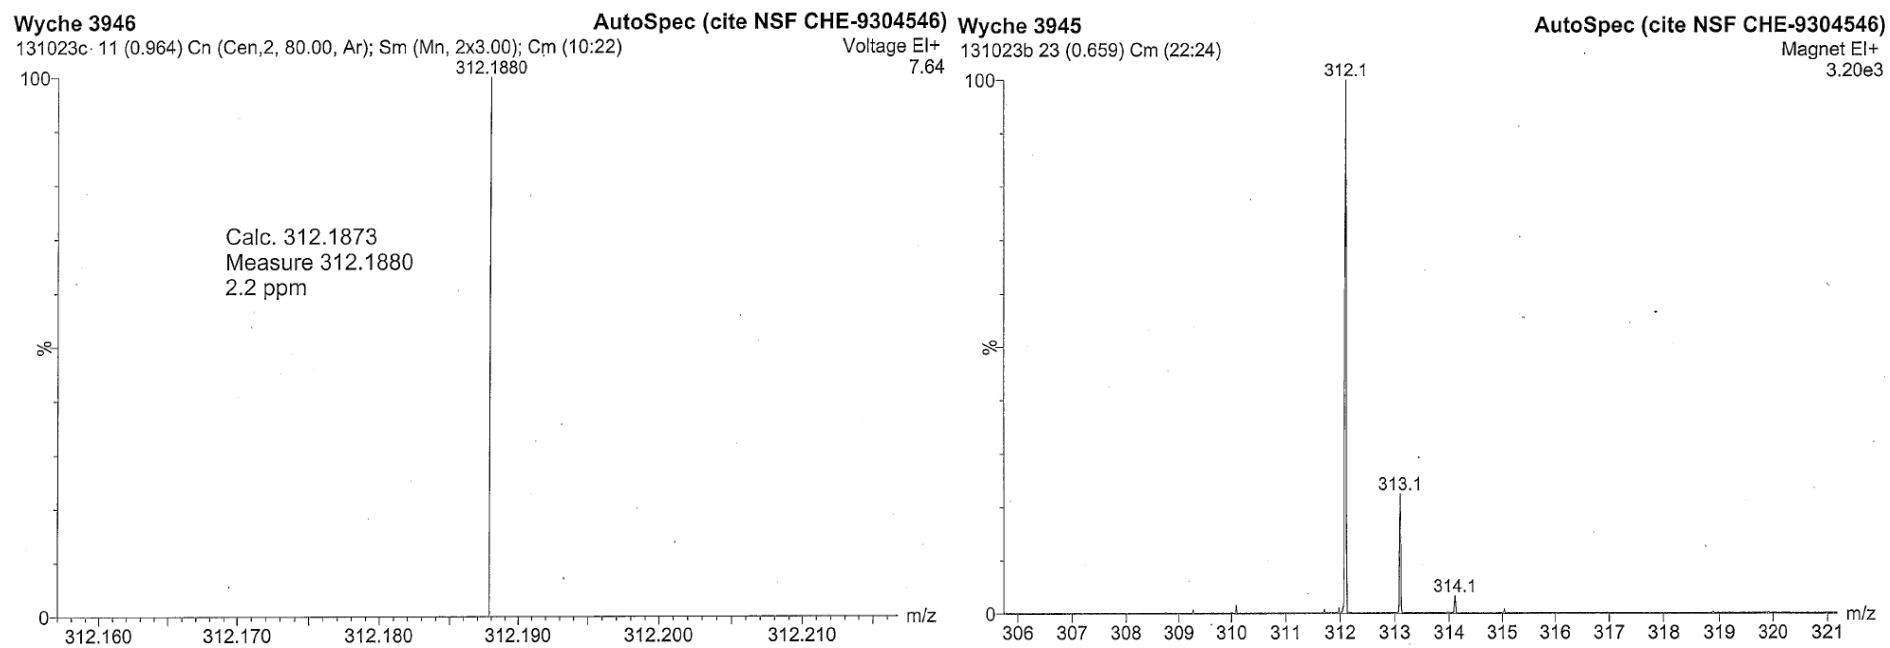

Supplement: marinedrugs-12-01013-s001.pdf [file marinedrugs-12-01013-s001.pdf]
